# Supplementary material for: An ultralong room-temperature phosphorescent material based on the combination of small singlet–triplet splitting energy and H-aggregation
Source: Royal Society of Chemistry journal article supplement (doi:10.1039/c9cc09636a), 2020-01-01
Supplement: c9cc09636a1.pdf [file c9cc09636a1.pdf]

## Electronic Supplementary Information (ESI)

### **Ultralong room-temperature phosphorescence material based on the combination of small singlet-triplet splitting energy and H-aggregation**

Liang Zhang,<sup>a,b</sup> Meng Li,<sup>b</sup> Qing-Yu Gao<sup>\*a</sup> and Chuan-Feng Chen<sup>\*b,c</sup>

<sup>a</sup> College of Chemical Engineering, China University of Mining and Technology, Xuzhou 221116, China

<sup>b</sup> Beijing National Laboratory for Molecular Sciences, CAS Key Laboratory of Molecular Recognition and Function, Institute of Chemistry, Chinese Academy of Sciences, Beijing 100190, China

<sup>c</sup> University of Chinese Academy of Sciences, Beijing 100049, China

E-mails: cchen@iccas.ac.cn; gaoqy@cumt.edu.cn

|                                                                 |            |
|-----------------------------------------------------------------|------------|
| <b>1. General information.....</b>                              | <b>S2</b>  |
| <b>2. Synthesis and characterization.....</b>                   | <b>S2</b>  |
| <b>3. X-Ray crystallographic data .....</b>                     | <b>S5</b>  |
| <b>4. Photophysical properties .....</b>                        | <b>S9</b>  |
| <b>5. Theoretic calculations .....</b>                          | <b>S11</b> |
| <b>6. <sup>1</sup>H NMR and <sup>13</sup>C NMR spectra.....</b> | <b>S15</b> |
| <b>7. Reference .....</b>                                       | <b>S19</b> |

## 1. General information

All reagents were obtained from commercial sources without further purification, and solvents were used as received except specifically mentioned. NMR spectra were recorded on AVIII 300-500 MHz NMR spectrometers. Mass spectra and high resolution mass spectra were recorded with Thermo Fisher<sup>®</sup> Exactive highresolution LC-MS spectrometer. Ultraviolet spectra were measured on a PerkinElmer<sup>®</sup> UV/Vis/NIR spectrometer (Lambda 950). The steady fluorescence spectra and lifetimes were recorded on Edinburgh Instruments FLS 980 spectrometer. The single crystals of **AI-Cz** and **AI-N-Cz** were used to perform the transient PL measurements and phosphorescence spectrum (size of **AI-Cz** is about 0.7mm × 0.7mm × 1.5mm; size of **AI-N-Cz** is about 0.8mm × 1.1mm × 1.3mm). Phosphorescence spectra were measured with a delay time of 1 ms in the crystalline states at room temperature. The values of lifetime were calculated by exponential function fitting with luminescence spectrometer software F900. Theoretical calculations were carried out using the Gaussian 09 program.

## 2. Synthesis and characterization

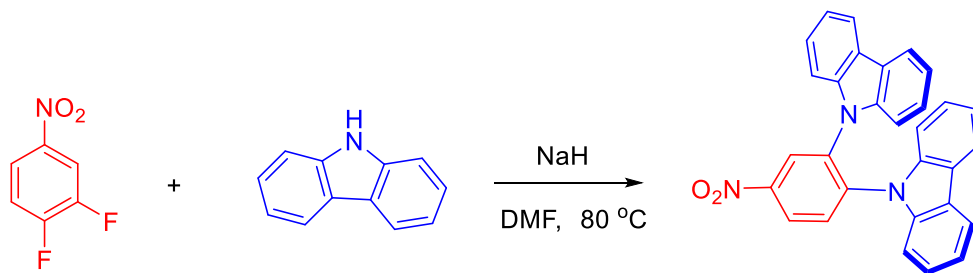

**9,9'-(4-Nitro-1,2-phenylene)bis(9H-carbazole)**: To a solution of carbazole (3.51 g, 21 mmol.) in dry DMF (30 mL) under argon atmosphere was added Cs<sub>2</sub>CO<sub>3</sub> (8.12 g, 25 mmol) at room temperature, and the mixture was stirred for 30 minutes. 1,2-difluoro-4-nitrobenzene (1.59 g, 20 mmol) was added, and the mixture was then stirred for 12 hours

at 80 °C. The mixture was poured into water (100 mL) and filtered to obtain the solid, which was washed by dichloromethane and petroleum ether (1:5, v/v) to give 9,9'-(4-nitro-1,2-phenylene)bis(9H-carbazole) (3.62g, 80 %) as a yellow solid. M.p. 250-251 °C; <sup>1</sup>H NMR (300 MHz, CDCl<sub>3</sub>): δ 8.75 (d, *J* = 2.6 Hz, 1H), 8.53 (dd, *J* = 8.8, 2.6 Hz, 1H), 8.05 (d, *J* = 8.8 Hz, 1H), 7.84-7.75 (m, 4H), 7.08-7.10 (m, 12H). <sup>13</sup>C NMR (126 MHz, CDCl<sub>3</sub>): δ 139.0, 138.9, 141.0, 126.0, 125.8, 124.0, 123.8, 123.2, 120.9, 120.8, 120.1, 109.4, 109.1, 77.2, 77.0, 76.7. HR-MS (APCI): *m/z* calcd for C<sub>30</sub>H<sub>19</sub>N<sub>3</sub>O<sub>2</sub> [M + H]<sup>+</sup> 453.1477, found 454.1545.

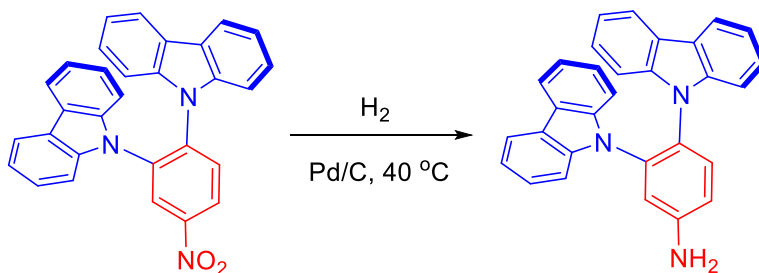

**3,4-Di(9H-carbazol-9-yl)aniline:** To a three-necked flask with palladium carbon (100 mg) and 9,9'-(4-nitro-1,2-phenylene)bis(9H-carbazole) (3 g, 6.6 mmol) in nitrogen was added THF (25 mL). Hydrogen was then introduced into the three-necked flask by hydrogenated balloon. The mixture was reacted at 40 °C for 12 h, cooled to room temperature, and then filtered to give the product (2.75 g, 98 %) as a white solid. M.p. 247-248 °C. <sup>1</sup>H NMR (300 MHz, CDCl<sub>3</sub>): δ 7.77 (dd, *J* = 7.2, 1.6 Hz, 4H), 7.52 (d, *J* = 8.5 Hz, 1H), 7.26-7.19 (m, 2H), 7.18-7.10 (m, 2H), 7.10-6.89 (m, 10H), 3.97 (s, 2H). <sup>13</sup>C NMR (126 MHz, CDCl<sub>3</sub>): δ 147.1, 140.4, 140.1, 131.3, 125.2, 125.2, 123.2, 123.1, 119.8, 119.6, 119.4, 115.6, 115.3, 110.0, 109.8. HR-MS (APCI): *m/z* calcd for C<sub>30</sub>H<sub>21</sub>N<sub>3</sub> [M + H]<sup>+</sup> 423.1735, found 424.1802.

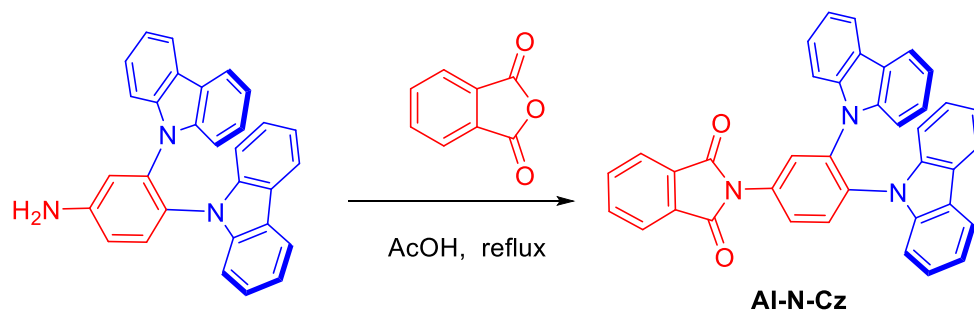

**AI-N-Cz:** A mixture of isobenzofuran-1,3-dione (700 mg, 4.73 mmol) and 3,4-di(9H-carbazol-9-yl)aniline (2 g, 4.73 mmol) in glacial acetic acid (20 mL) was refluxed for 12 hours. The mixture was cooled to room temperature, and then filtered to give the product **AI-N-Cz** (2.41 g, 82 %) as a white solid. M.p. 244-245 °C.  $^1\text{H}$  NMR (300 MHz,  $\text{CDCl}_3$ ):  $\delta$  8.05-7.94 (m, 4H), 7.88-7.74 (m, 7H), 7.32-7.18 (m, 5H), 7.10-7.03 (m, 7H).  $^{13}\text{C}$  NMR (126 MHz,  $\text{CDCl}_3$ ):  $\delta$  166.9, 139.6, 139.5, 134.8, 131.6, 130.8, 128.1, 126.0, 125.6, 125.5, 124.0, 123.6, 123.5, 120.1, 120.1, 119.9, 119.8, 109.8, 109.7. HR-MS (APCI):  $m/z$  calcd for  $\text{C}_{38}\text{H}_{23}\text{N}_3\text{O}_2$  [ $\text{M} + \text{H}$ ] $^+$  553.1790, found 554.1852.

### 3. X-Ray crystallographic data

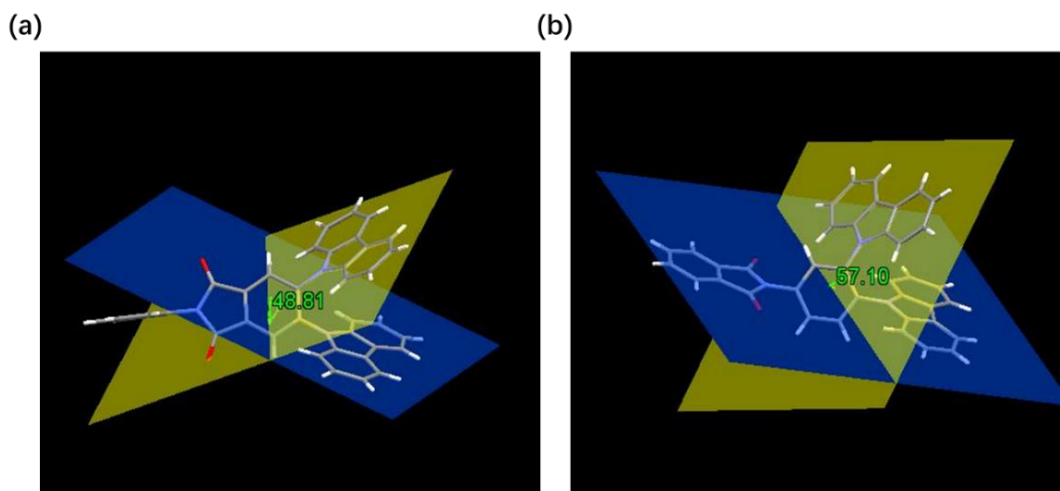

**Fig. S1** Dihedral angles of (a) **Al-Cz** and (b) **Al-N-Cz** between the carbazole and carbazole group, respectively.

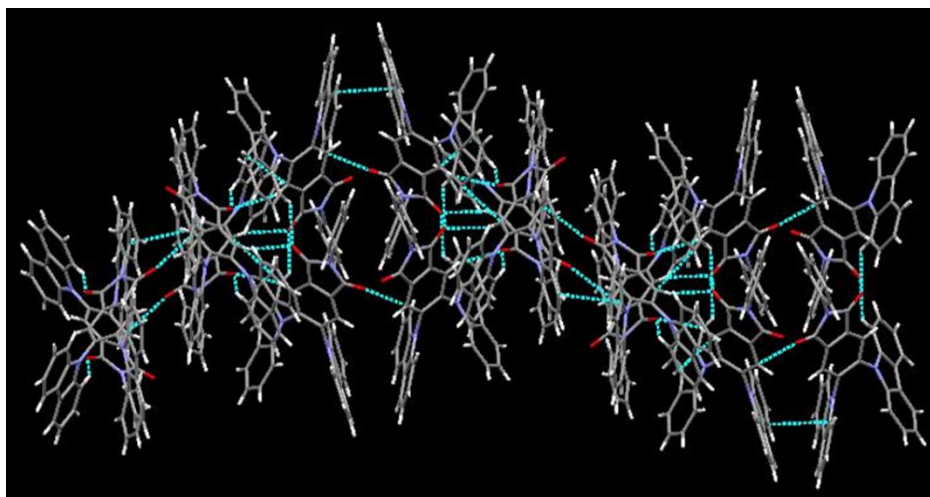

**Fig. S2** Intermolecular interactions of **Al-Cz** (C-H...O; 2.406-2.512 Å, C-H... $\pi$ ; 3.372-3.386 Å).

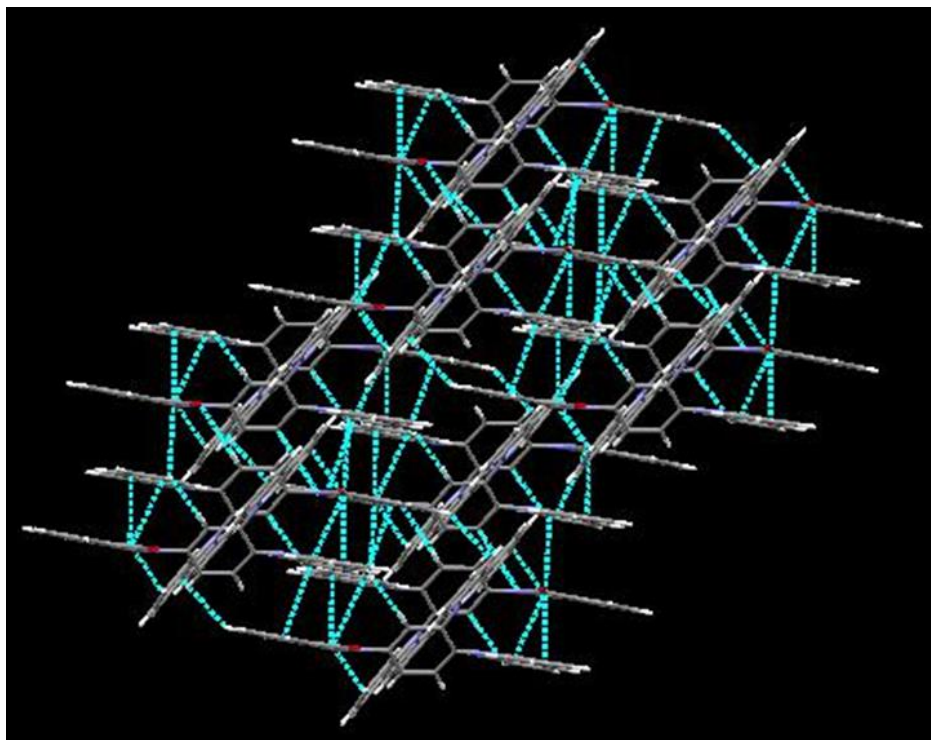

**Fig. S3** Intermolecular interactions of **Al-N-Cz** (C-H...O; 2.616 Å, C-H...π; 3.312-3.346 Å).

**Table S1.** Crystal data and structure refinement for **AI-N-Cz**

| Identification code                         | <b>AI-N-Cz</b>                                                                |
|---------------------------------------------|-------------------------------------------------------------------------------|
| Empirical formula                           | C <sub>39</sub> H <sub>25</sub> Cl <sub>2</sub> N <sub>3</sub> O <sub>2</sub> |
| Formula weight                              | 638.52                                                                        |
| Temperature/K                               | 170.00(11)                                                                    |
| Crystal system                              | triclinic                                                                     |
| Space group                                 | P-1                                                                           |
| a/Å                                         | 9.44150(10)                                                                   |
| b/Å                                         | 11.5767(2)                                                                    |
| c/Å                                         | 15.2148(2)                                                                    |
| α/°                                         | 91.7300(10)                                                                   |
| β/°                                         | 103.5750(10)                                                                  |
| γ/°                                         | 110.2320(10)                                                                  |
| Volume/Å <sup>3</sup>                       | 1505.45(4)                                                                    |
| Z                                           | 2                                                                             |
| ρ <sub>calc</sub> /cm <sup>3</sup>          | 1.409                                                                         |
| μ/mm <sup>-1</sup>                          | 2.276                                                                         |
| F(000)                                      | 660.0                                                                         |
| Crystal size/mm <sup>3</sup>                | 0.423 × 0.321 × 0.311                                                         |
| Radiation                                   | CuKα (λ = 1.54184)                                                            |
| 2θ range for data collection/°              | 8.202 to 150.748                                                              |
| Index ranges                                | -10 ≤ h ≤ 11, -14 ≤ k ≤ 14, -19 ≤ l ≤ 19                                      |
| Reflections collected                       | 25723                                                                         |
| Independent reflections                     | 6008 [R <sub>int</sub> = 0.0317, R <sub>sigma</sub> = 0.0148]                 |
| Data/restraints/parameters                  | 6008/0/415                                                                    |
| Goodness-of-fit on F <sup>2</sup>           | 1.054                                                                         |
| Final R indexes [I >= 2σ (I)]               | R <sub>1</sub> = 0.0425, wR <sub>2</sub> = 0.1090                             |
| Final R indexes [all data]                  | R <sub>1</sub> = 0.0444, wR <sub>2</sub> = 0.1120                             |
| Largest diff. peak/hole / e Å <sup>-3</sup> | 0.49/-0.53                                                                    |

**Table S2.** Crystal data and structure refinement for **AI-Cz**

| Identification code                         | <b>AI-Cz</b>                                                   |
|---------------------------------------------|----------------------------------------------------------------|
| Empirical formula                           | C <sub>38</sub> H <sub>23</sub> N <sub>3</sub> O <sub>2</sub>  |
| Formula weight                              | 553.59                                                         |
| Temperature/K                               | 169.99(11)                                                     |
| Crystal system                              | tetragonal                                                     |
| Space group                                 | P4 <sub>1</sub>                                                |
| a/Å                                         | 15.82204(12)                                                   |
| b/Å                                         | 15.82204(12)                                                   |
| c/Å                                         | 44.7484(4)                                                     |
| α/°                                         | 90                                                             |
| β/°                                         | 90                                                             |
| γ/°                                         | 90                                                             |
| Volume/Å <sup>3</sup>                       | 11202.2(2)                                                     |
| Z                                           | 16                                                             |
| ρ <sub>calc</sub> /cm <sup>3</sup>          | 1.313                                                          |
| μ/mm <sup>-1</sup>                          | 0.651                                                          |
| F(000)                                      | 4608.0                                                         |
| Crystal size/mm <sup>3</sup>                | 0.2 × 0.12 × 0.1                                               |
| Radiation                                   | CuKα (λ = 1.54184)                                             |
| 2θ range for data collection/°              | 5.586 to 151.176                                               |
| Index ranges                                | -19 ≤ h ≤ 19, -16 ≤ k ≤ 17, -56 ≤ l ≤ 48                       |
| Reflections collected                       | 37665                                                          |
| Independent reflections                     | 19098 [R <sub>int</sub> = 0.0361, R <sub>sigma</sub> = 0.0462] |
| Data/restraints/parameters                  | 19098/1/1549                                                   |
| Goodness-of-fit on F <sup>2</sup>           | 1.038                                                          |
| Final R indexes [I >= 2σ (I)]               | R <sub>1</sub> = 0.0463, wR <sub>2</sub> = 0.1147              |
| Final R indexes [all data]                  | R <sub>1</sub> = 0.0599, wR <sub>2</sub> = 0.1278              |
| Largest diff. peak/hole / e Å <sup>-3</sup> | 0.36/-0.26                                                     |
| Flack parameter                             | -0.14(18)                                                      |



## 4. Photophysical properties

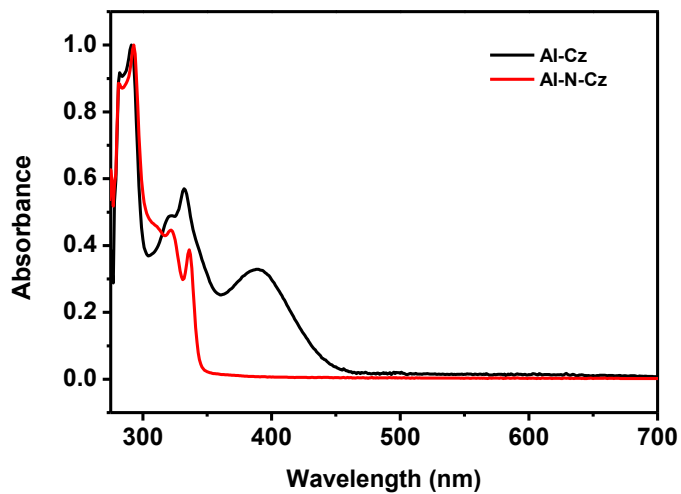

Fig. S4 Absorption spectra of Al-Cz and Al-N-Cz in toluene ( $c = 1.0 \times 10^{-5}$  M).

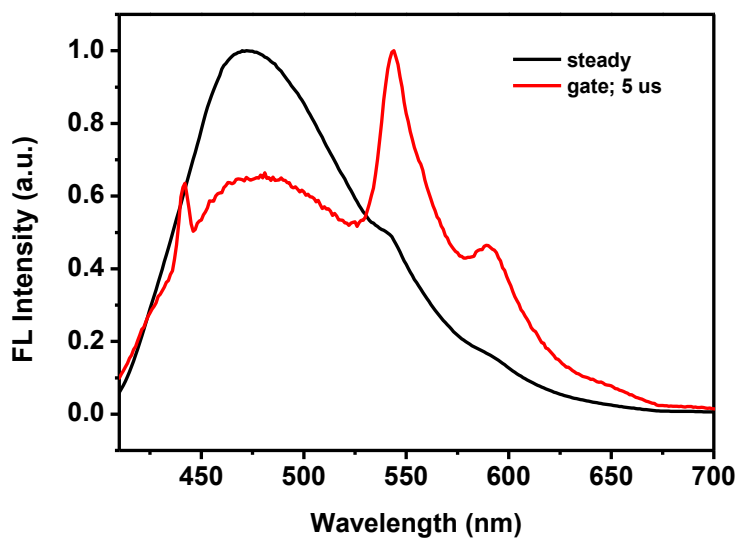

Fig. S5 Normalized steady-state and time-gated emission spectra ( $\lambda_{\text{ex}}=340$  nm) of Al-N-Cz in the crystal state.

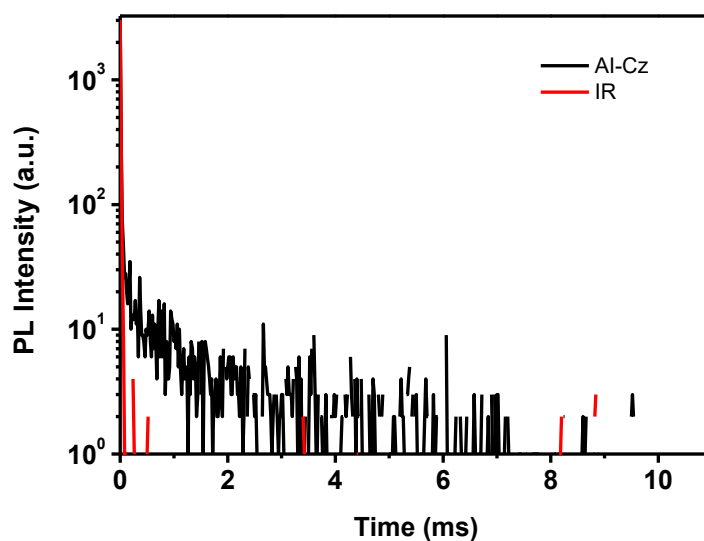

**Fig. S6** Transient PL curves of **Al-Cz** ( $\lambda_{em}=520$  nm) at room temperature in crystalline state (crystal of **Al-Cz** was obtained in a mixture of hexane and dichloromethane).

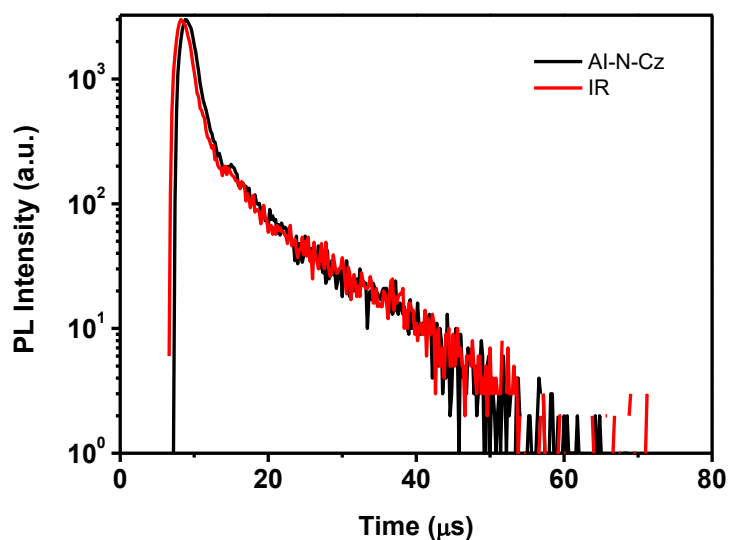

**Fig. S7** Transient PL curves of **Al-N-Cz** ( $\lambda_{em}=445$  nm) at room temperature in crystalline state. In order to avoid influence of instrument noise when using the microflash lamp for the phosphorescence lifetime spectral test, the IR (instrument reference) of the microflash lamp was measured. And related parameter settings of repetition rate of the flashlamp were as follows: The frequency and pulse period of flashlamp settings for phosphorescence spectra were 100 Hz and 10 ms, respectively. For lifetime of **Al-Cz**, they were 40 Hz and 20 ms respectively, while for lifetime of **Al-N-Cz**, they were 0.1 Hz and 10s, respectively.

## 5. Theoretic calculations

DFT calculations were performed with the Gaussian 09 revision D.01. The excited state geometries of **AI-Cz/AI-N-Cz** were optimized by DFT with B3LYP method. In order to investigate the energy difference between the lowest singlet ( $S_1$ ) and triplet ( $T_1$ ) excited states, time-dependent density functional theory (TD-DFT) with B3LYP method, was used to optimize the geometries of  $S_1$  and  $T_1$ , respectively. Finally, we could get the energy of the highest occupied molecular orbital (HOMO) and the lowest unoccupied molecular orbital (LUMO) for the ground state of **AI-Cz/AI-N-Cz**. All the above calculations were carried out by using Gaussian 09 software with the 6-31G(d,p) basis set and the molecular orbitals were visualized by using Gauss View 5.0 software.<sup>S1</sup>

**Table S3.** Optimized atomic coordinates of **AI-Cz** obtained from DFT calculations.

| Center Number | Atomic Number | Atomic Type | Coordinates (Angstroms) |           |           |
|---------------|---------------|-------------|-------------------------|-----------|-----------|
|               |               |             | X                       | Y         | Z         |
| 1             | 6             | 0           | -0.182779               | -0.672106 | -0.235336 |
| 2             | 6             | 0           | -0.182781               | 0.672122  | 0.235278  |
| 3             | 6             | 0           | 1.037425                | 1.342283  | 0.446315  |
| 4             | 6             | 0           | 2.217875                | 0.662943  | 0.212552  |
| 5             | 6             | 0           | 2.217877                | -0.662899 | -0.212682 |
| 6             | 6             | 0           | 1.037428                | -1.342256 | -0.446398 |
| 7             | 6             | 0           | 3.628749                | 1.115591  | 0.360102  |
| 8             | 7             | 0           | 4.429027                | 0.000026  | -0.000073 |
| 9             | 6             | 0           | 3.628752                | -1.115528 | -0.360282 |
| 10            | 8             | 0           | 4.032857                | -2.204896 | -0.706666 |
| 11            | 8             | 0           | 4.032851                | 2.204924  | 0.706600  |
| 12            | 6             | 0           | 5.857567                | 0.000007  | -0.000012 |

|    |   |   |           |           |           |
|----|---|---|-----------|-----------|-----------|
| 13 | 6 | 0 | 6.554404  | -1.122083 | 0.462842  |
| 14 | 6 | 0 | 7.948048  | -1.117679 | 0.453184  |
| 15 | 6 | 0 | 8.649838  | -0.000026 | 0.000083  |
| 16 | 6 | 0 | 7.948105  | 1.117643  | -0.453067 |
| 17 | 6 | 0 | 6.554461  | 1.122081  | -0.462819 |
| 18 | 7 | 0 | -1.381615 | -1.371515 | -0.500832 |
| 19 | 7 | 0 | -1.381615 | 1.371519  | 0.500813  |
| 20 | 6 | 0 | -1.707081 | -2.632573 | 0.028764  |
| 21 | 6 | 0 | -2.920854 | -3.073959 | -0.551490 |
| 22 | 6 | 0 | -3.334648 | -2.054305 | -1.493803 |
| 23 | 6 | 0 | -2.363098 | -1.025139 | -1.447761 |
| 24 | 6 | 0 | -1.707101 | 2.632582  | -0.028758 |
| 25 | 6 | 0 | -2.920863 | 3.073952  | 0.551530  |
| 26 | 6 | 0 | -3.334627 | 2.054283  | 1.493840  |
| 27 | 6 | 0 | -2.363071 | 1.025125  | 1.447763  |
| 28 | 6 | 0 | -4.413327 | -1.947346 | -2.378291 |
| 29 | 6 | 0 | -4.501212 | -0.832098 | -3.205821 |
| 30 | 6 | 0 | -3.516049 | 0.167471  | -3.162965 |
| 31 | 6 | 0 | -2.433188 | 0.084741  | -2.289899 |
| 32 | 6 | 0 | -1.040615 | -3.388140 | 0.996563  |
| 33 | 6 | 0 | -1.604511 | -4.607712 | 1.369425  |
| 34 | 6 | 0 | -2.804077 | -5.062691 | 0.799635  |
| 35 | 6 | 0 | -3.467243 | -4.299863 | -0.157895 |
| 36 | 6 | 0 | -1.040665 | 3.388167  | -0.996564 |
| 37 | 6 | 0 | -1.604580 | 4.607738  | -1.369399 |
| 38 | 6 | 0 | -2.804136 | 5.062701  | -0.799575 |
| 39 | 6 | 0 | -3.467273 | 4.299856  | 0.157962  |
| 40 | 6 | 0 | -4.413283 | 1.947306  | 2.378354  |
| 41 | 6 | 0 | -4.501140 | 0.832047  | 3.205872  |
| 42 | 6 | 0 | -3.515971 | -0.167514 | 3.162981  |
| 43 | 6 | 0 | -2.433131 | -0.084766 | 2.289890  |
| 44 | 1 | 0 | 1.038418  | 2.363135  | 0.811583  |
| 45 | 1 | 0 | 1.038421  | -2.363110 | -0.811661 |
| 46 | 1 | 0 | 6.010399  | -1.990601 | 0.810942  |
| 47 | 1 | 0 | 8.484640  | -1.992626 | 0.807360  |
| 48 | 1 | 0 | 9.735585  | -0.000040 | 0.000119  |
| 49 | 1 | 0 | 8.484741  | 1.992579  | -0.807205 |
| 50 | 1 | 0 | 6.010500  | 1.990611  | -0.810959 |
| 51 | 1 | 0 | -5.165922 | -2.729184 | -2.422429 |

|    |   |   |           |           |           |
|----|---|---|-----------|-----------|-----------|
| 52 | 1 | 0 | -5.333402 | -0.735586 | -3.896092 |
| 53 | 1 | 0 | -3.594995 | 1.026022  | -3.822834 |
| 54 | 1 | 0 | -1.678510 | 0.861322  | -2.274512 |
| 55 | 1 | 0 | -0.114188 | -3.046990 | 1.445883  |
| 56 | 1 | 0 | -1.101803 | -5.214873 | 2.116135  |
| 57 | 1 | 0 | -3.217056 | -6.017176 | 1.110518  |
| 58 | 1 | 0 | -4.398290 | -4.650063 | -0.593856 |
| 59 | 1 | 0 | -0.114244 | 3.047031  | -1.445909 |
| 60 | 1 | 0 | -1.101894 | 5.214911  | -2.116115 |
| 61 | 1 | 0 | -3.217131 | 6.017186  | -1.110437 |
| 62 | 1 | 0 | -4.398311 | 4.650043  | 0.593949  |
| 63 | 1 | 0 | -5.165883 | 2.729138  | 2.422519  |
| 64 | 1 | 0 | -5.333313 | 0.735521  | 3.896162  |
| 65 | 1 | 0 | -3.594894 | -1.026073 | 3.822843  |
| 66 | 1 | 0 | -1.678447 | -0.861340 | 2.274475  |

**Table S4.** Optimized atomic coordinates of **Al-N-Cz** obtained from DFT calculations.

| Center<br>Number | Atomic<br>Number | Atomic<br>Type | Coordinates (Angstroms) |           |           |
|------------------|------------------|----------------|-------------------------|-----------|-----------|
|                  |                  |                | X                       | Y         | Z         |
| 1                | 6                | 0              | 8.243349                | -0.882741 | 0.340931  |
| 2                | 6                | 0              | 8.120633                | 0.432162  | -0.127016 |
| 3                | 6                | 0              | 6.866954                | 0.979337  | -0.427446 |
| 4                | 6                | 0              | 5.757260                | 0.167308  | -0.242062 |
| 5                | 6                | 0              | 5.879488                | -1.142016 | 0.221582  |
| 6                | 6                | 0              | 7.116310                | -1.694100 | 0.522454  |
| 7                | 6                | 0              | 4.315411                | 0.457426  | -0.471902 |
| 8                | 7                | 0              | 3.622626                | -0.729244 | -0.113985 |
| 9                | 6                | 0              | 4.520959                | -1.746049 | 0.305507  |
| 10               | 8                | 0              | 4.212007                | -2.866446 | 0.650029  |
| 11               | 8                | 0              | 3.807276                | 1.479555  | -0.882006 |
| 12               | 6                | 0              | 2.211200                | -0.883350 | -0.201531 |
| 13               | 6                | 0              | 1.655533                | -2.060373 | -0.714065 |
| 14               | 6                | 0              | 0.275161                | -2.167035 | -0.819542 |
| 15               | 6                | 0              | -0.579320               | -1.124229 | -0.434397 |
| 16               | 6                | 0              | -0.013501               | 0.048775  | 0.116168  |
| 17               | 6                | 0              | 1.378385                | 0.148903  | 0.228333  |

|    |   |   |           |           |           |
|----|---|---|-----------|-----------|-----------|
| 18 | 7 | 0 | -0.798547 | 1.144598  | 0.551868  |
| 19 | 7 | 0 | -1.975676 | -1.285716 | -0.617738 |
| 20 | 6 | 0 | -0.638372 | 2.469484  | 0.112415  |
| 21 | 6 | 0 | -1.561580 | 3.294667  | 0.801279  |
| 22 | 6 | 0 | -2.287183 | 2.441738  | 1.719413  |
| 23 | 6 | 0 | -1.786673 | 1.127318  | 1.548677  |
| 24 | 6 | 0 | -2.731915 | -2.356228 | -0.118994 |
| 25 | 6 | 0 | -4.056016 | -2.254712 | -0.613778 |
| 26 | 6 | 0 | -4.096607 | -1.087912 | -1.470641 |
| 27 | 6 | 0 | -2.798307 | -0.520422 | -1.459679 |
| 28 | 6 | 0 | -3.279847 | 2.684491  | 2.675349  |
| 29 | 6 | 0 | -3.747198 | 1.627168  | 3.449771  |
| 30 | 6 | 0 | -3.223810 | 0.334634  | 3.282195  |
| 31 | 6 | 0 | -2.236666 | 0.066674  | 2.336378  |
| 32 | 6 | 0 | 0.233706  | 2.987947  | -0.849272 |
| 33 | 6 | 0 | 0.163553  | 4.355026  | -1.114168 |
| 34 | 6 | 0 | -0.748922 | 5.186460  | -0.444876 |
| 35 | 6 | 0 | -1.612181 | 4.662787  | 0.513400  |
| 36 | 6 | 0 | -5.099366 | -0.502852 | -2.252011 |
| 37 | 6 | 0 | -4.794655 | 0.621629  | -3.012694 |
| 38 | 6 | 0 | -3.497036 | 1.159592  | -3.003471 |
| 39 | 6 | 0 | -2.481619 | 0.597479  | -2.232898 |
| 40 | 6 | 0 | -2.351684 | -3.383091 | 0.749543  |
| 41 | 6 | 0 | -3.320199 | -4.317419 | 1.113506  |
| 42 | 6 | 0 | -4.635828 | -4.233420 | 0.629567  |
| 43 | 6 | 0 | -5.009067 | -3.204637 | -0.231124 |
| 44 | 1 | 0 | 9.229548  | -1.277481 | 0.564932  |
| 45 | 1 | 0 | 9.013666  | 1.035489  | -0.257770 |
| 46 | 1 | 0 | 6.759033  | 1.996134  | -0.790010 |
| 47 | 1 | 0 | 7.198164  | -2.714248 | 0.882476  |
| 48 | 1 | 0 | 2.294126  | -2.873154 | -1.034252 |
| 49 | 1 | 0 | -0.165108 | -3.062532 | -1.244181 |
| 50 | 1 | 0 | 1.801941  | 1.047517  | 0.656378  |
| 51 | 1 | 0 | -3.673248 | 3.687345  | 2.814952  |
| 52 | 1 | 0 | -4.517886 | 1.801609  | 4.194260  |
| 53 | 1 | 0 | -3.593431 | -0.477382 | 3.901128  |
| 54 | 1 | 0 | -1.839056 | -0.934324 | 2.222662  |
| 55 | 1 | 0 | 0.959479  | 2.362977  | -1.357619 |
| 56 | 1 | 0 | 0.835610  | 4.782355  | -1.852350 |

|    |   |   |           |           |           |
|----|---|---|-----------|-----------|-----------|
| 57 | 1 | 0 | -0.776952 | 6.247090  | -0.675152 |
| 58 | 1 | 0 | -2.317104 | 5.306455  | 1.031775  |
| 59 | 1 | 0 | -6.099497 | -0.926439 | -2.268313 |
| 60 | 1 | 0 | -5.563431 | 1.086224  | -3.622417 |
| 61 | 1 | 0 | -3.275863 | 2.034088  | -3.607948 |
| 62 | 1 | 0 | -1.484963 | 1.021910  | -2.237034 |
| 63 | 1 | 0 | -1.337825 | -3.457048 | 1.128097  |
| 64 | 1 | 0 | -3.047391 | -5.125789 | 1.785448  |
| 65 | 1 | 0 | -5.366714 | -4.977304 | 0.931200  |
| 66 | 1 | 0 | -6.028286 | -3.138332 | -0.600866 |

---





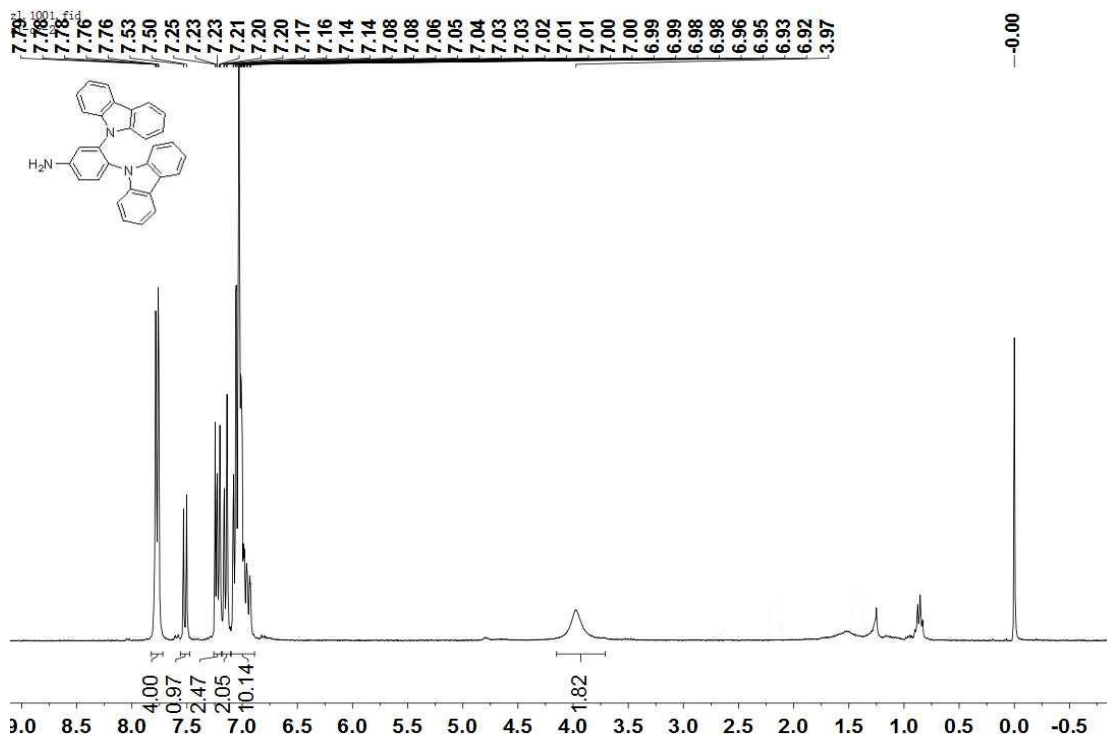

Fig. S10  $^1\text{H}$  NMR spectrum (300 MHz,  $\text{CDCl}_3$ ) of (3s,4s)-3,4-di(9H-carbazol-9-yl)aniline.

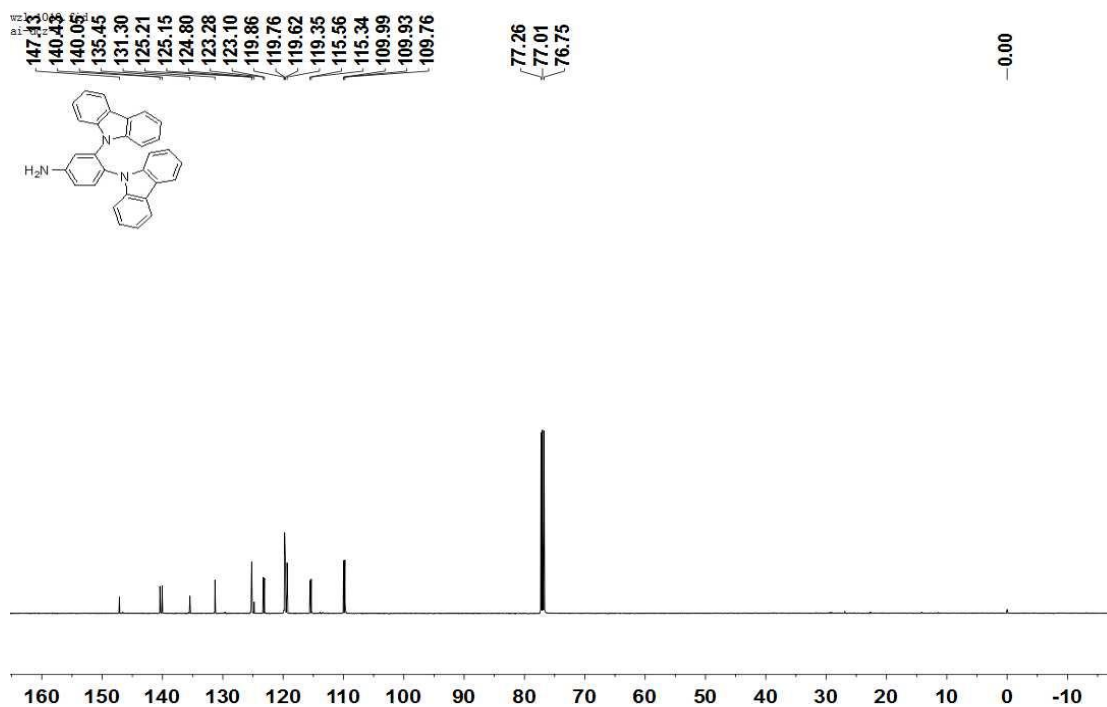

Fig. S11  $^{13}\text{C}$  NMR spectrum (126 MHz,  $\text{CDCl}_3$ ) of (3s,4s)-3,4-di(9H-carbazol-9-yl)aniline.

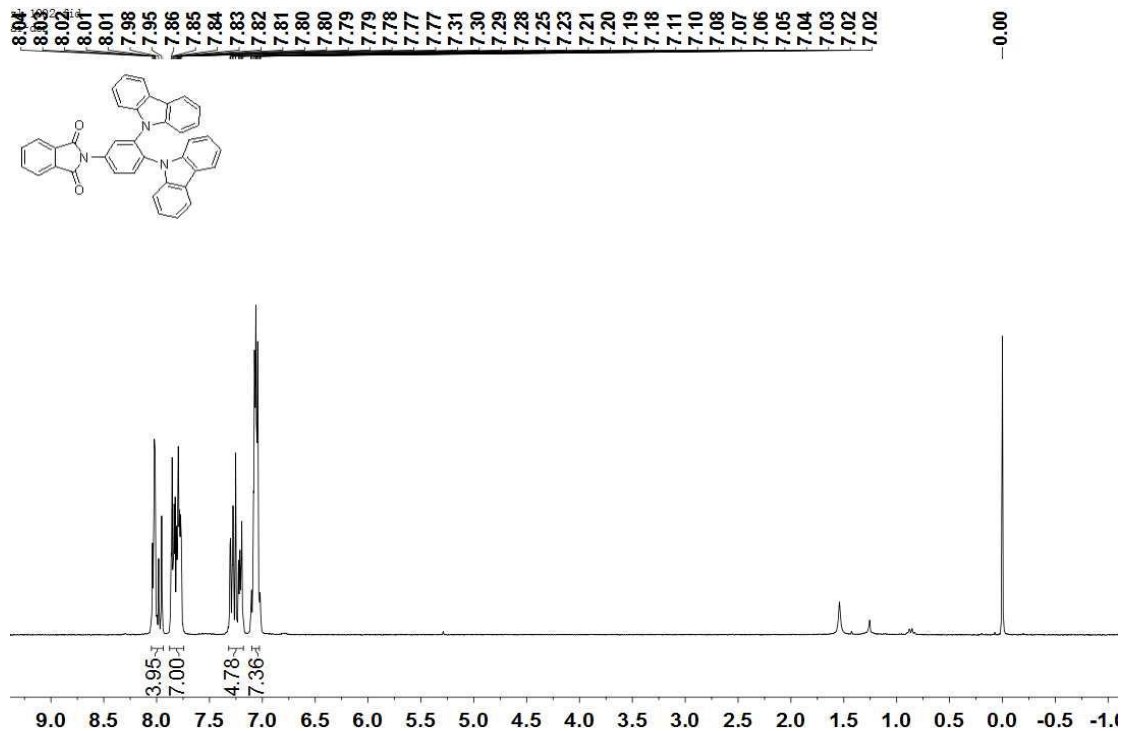

Fig. S12  $^1\text{H}$  NMR spectrum (300 MHz,  $\text{CDCl}_3$ ) of AI-N-Cz.

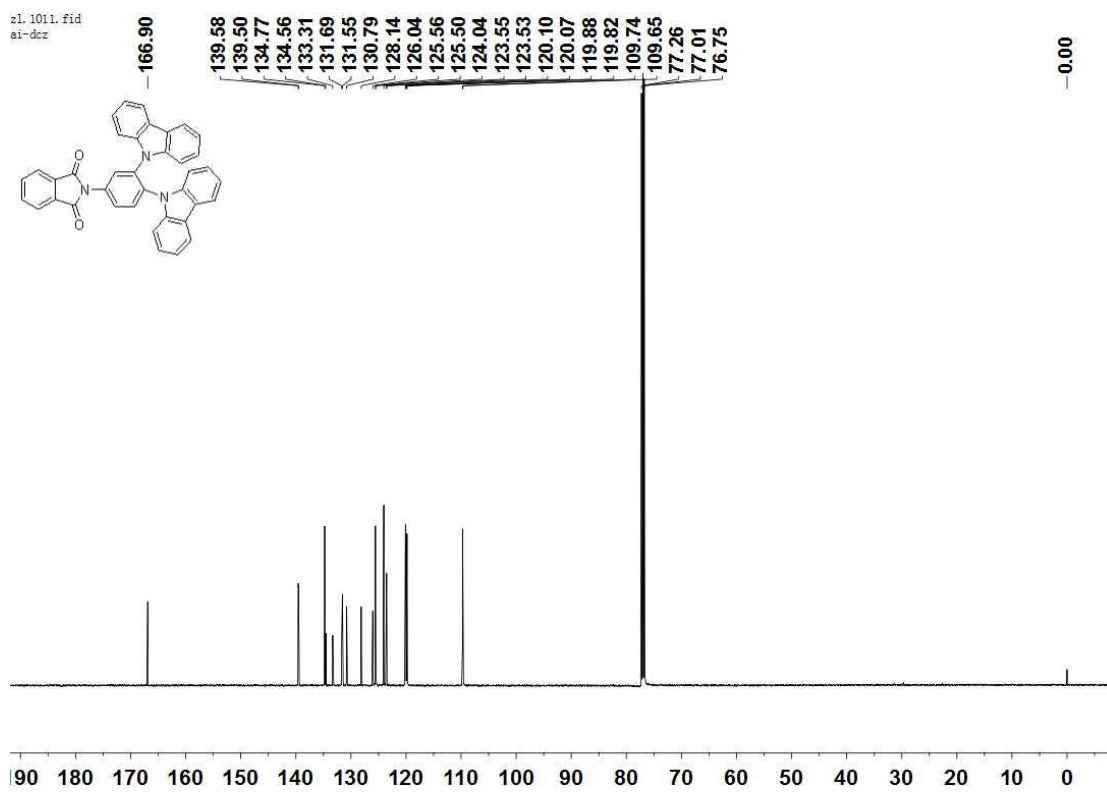

Fig. S13  $^{13}\text{C}$  NMR spectrum (126 MHz,  $\text{CDCl}_3$ ) of AI-N-Cz.

## 7. Reference

S1. Gaussian 09, Revision D.01, M. J. Frisch, G. W. Trucks, H. B. Schlegel, G. E. Scuseria, M. A. Robb, J. R. Cheeseman, G. Scalmani, V. Barone, B. Mennucci, G. A. Petersson, H. Nakatsuji, M. Caricato, X. Li, H. P. Hratchian, A. F. Izmaylov, J. Bloino, G. Zheng, J. L. Sonnenberg, M. Hada, M. Ehara, K. Toyota, R. Fukuda, J. Hasegawa, M. Ishida, T. Nakajima, Y. Honda, O. Kitao, H. Nakai, T. Vreven, J. A. Montgomery, Jr., J. E. Peralta, F. Ogliaro, M. Bearpark, J. J. Heyd, E. Brothers, K. N. Kudin, V. N. Staroverov, T. Keith, R. Kobayashi, J. Normand, K. Raghavachari, A. Rendell, J. C. Burant, S. S. Iyengar, J. Tomasi, M. Cossi, N. Rega, J. M. Millam, M. Klene, J. E. Knox, J. B. Cross, V. Bakken, C. Adamo, J. Jaramillo, R. Gomperts, R. E. Stratmann, O. Yazyev, A. J. Austin, R. Cammi, C. Pomelli, J. W. Ochterski, R. L. Martin, K. Morokuma, V. G. Zakrzewski, G. A. Voth, P. Salvador, J. J. Dannenberg, S. Dapprich, A. D. Daniels, O. Farkas, J. B. Foresman, J. V. Ortiz, J. Cioslowski, and D. J. Fox, Gaussian, Inc., Wallingford CT, 2013.
